# Supplementary material for: Essential Oils as Antimicrobial Agents—Myth or Real Alternative?
Source: PubMed Central journal article supplement (PMC6612361; doi:10.3390/molecules24112130), 2019-06-05
Supplement: molecules-24-02130-s001.pdf [file molecules-24-02130-s001.pdf]

# Supplementary data

## Essential Oils as Antimicrobial Agents – Myth or Real Alternative?

Katarzyna Wińska, Wanda Mączka, Jacek Łyczko, Małgorzata Grabarczyk, Anna Czubaszek, Antoni Szumny

### **Samples and materials:**

Samples of essential oil were obtained from local distillery (Herbiness, Poland).

### **GC-MS Analysis**

GC-MS analysis was performed on Shimadzu GCMS-QP2020 NX apparatus (Shimadzu, Kyoto, Japan) equipped with a ZB-5 (30 m x 0.25 mm x 1.40  $\mu$ m) column Phenomenex (US). Briefly, the GC oven temperature was programmed from 50 °C to 130°C at a rate of 4.0 °C and holding for 2 min, then to 280°C at a rate of 10.0°C and holding for 5 min. Samples were injected at 1:10 split ratio and helium was used as a carrier gas with flow rate of 1.0 ml/min. Scanning was performed from 35 to 500 m/z with an absolute detector voltage of 1 kV. Ionization was performed in electron impact (EI) mode at 70 eV.

### **Identification and quantification of Volatile Compounds**

Identification of volatile compounds was based on the comparison of experimentally obtained mass spectra with mass spectra available in NIST 14 database. Moreover, obtained retention indices (RI) by Kovats were compared with RI available in literature sources. The data proceeding was performed using GCMS Postrun Analysis software (Shimadzu, Kyoto, Japan). Quantification was based on internal standard (2-undecanone), as well as *n*-hexanol calibration curves.

**Figure S1.** The chromatogram of lavender oil.

**Figure S2.** The chromatogram of thyme oil.

**Figure S3.** The chromatogram of peppermint oil.

**Figure S4.** The chromatogram of cajeput oil.

**Figure S5.** The chromatogram of cinnamon oil.

**Figure S6.** The chromatogram of eucalyptus oil.

**Figure S7.** The chromatogram of clove oil.

**Figure S8.** The chromatogram of sage oil.

**Figure S9.** The chromatogram of tea tree oil.

**Table S1.** Chemical composition of EOs.

**Table S2.** The antimicrobiological activity of EOs.

lawenda\_11\_1\_Centroided Mass Spectrum\_EI+

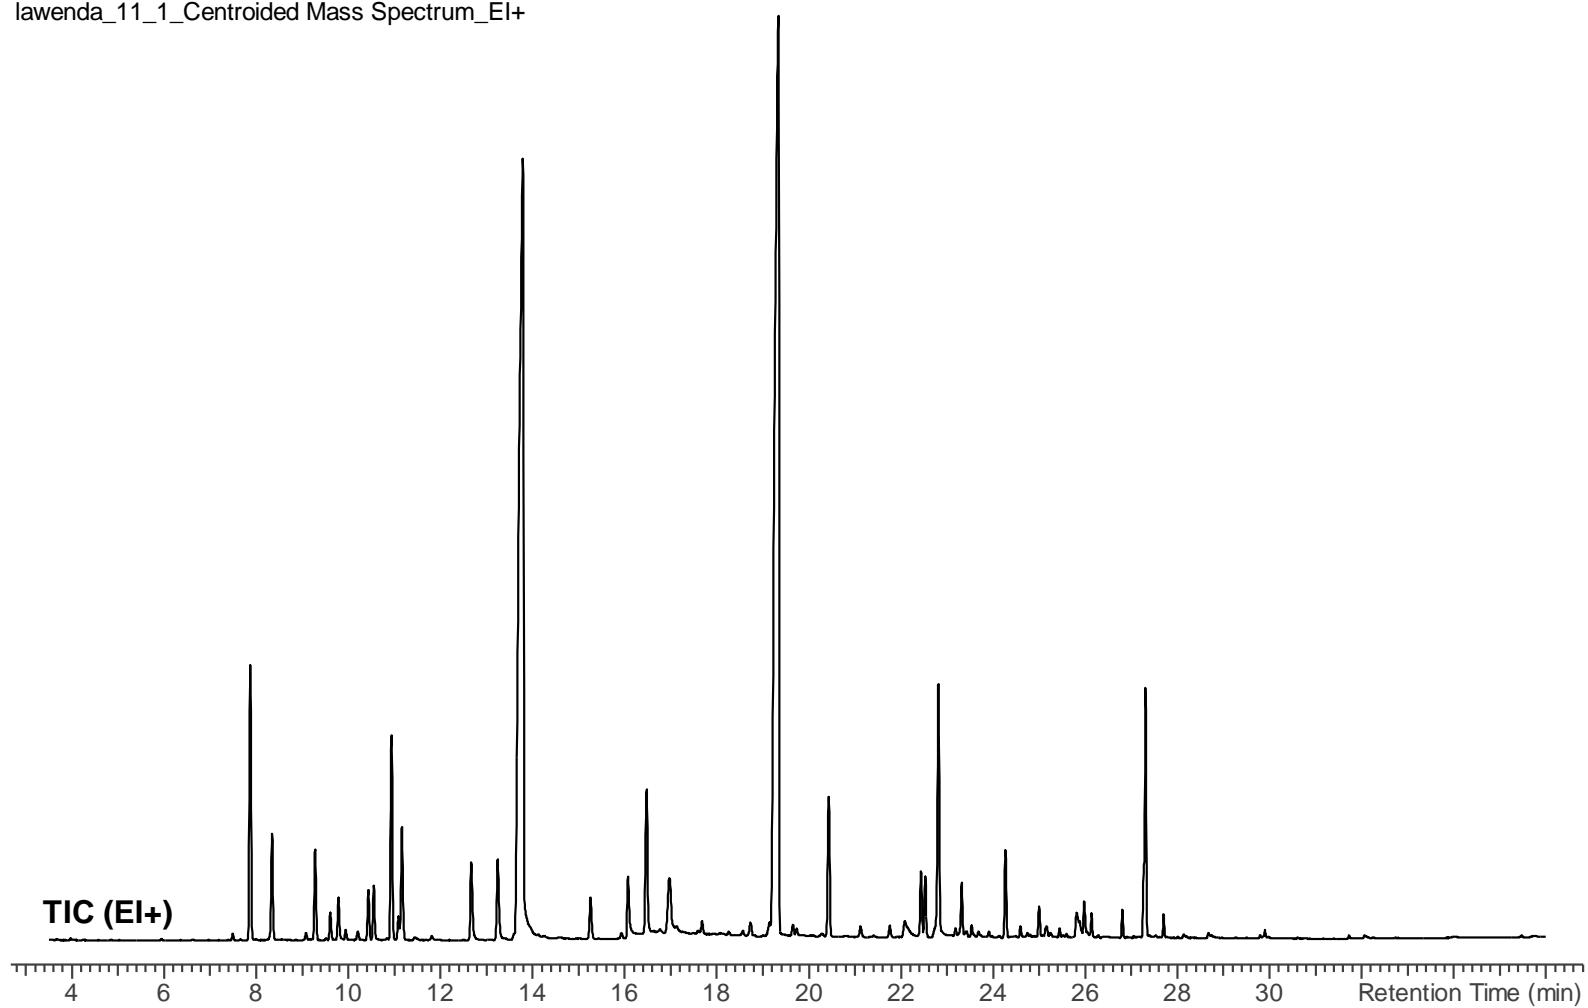

Figure S1. The chromatogram of lavender oil.

tymiankowy\_4\_1\_Centroided Mass Spectrum\_EI+

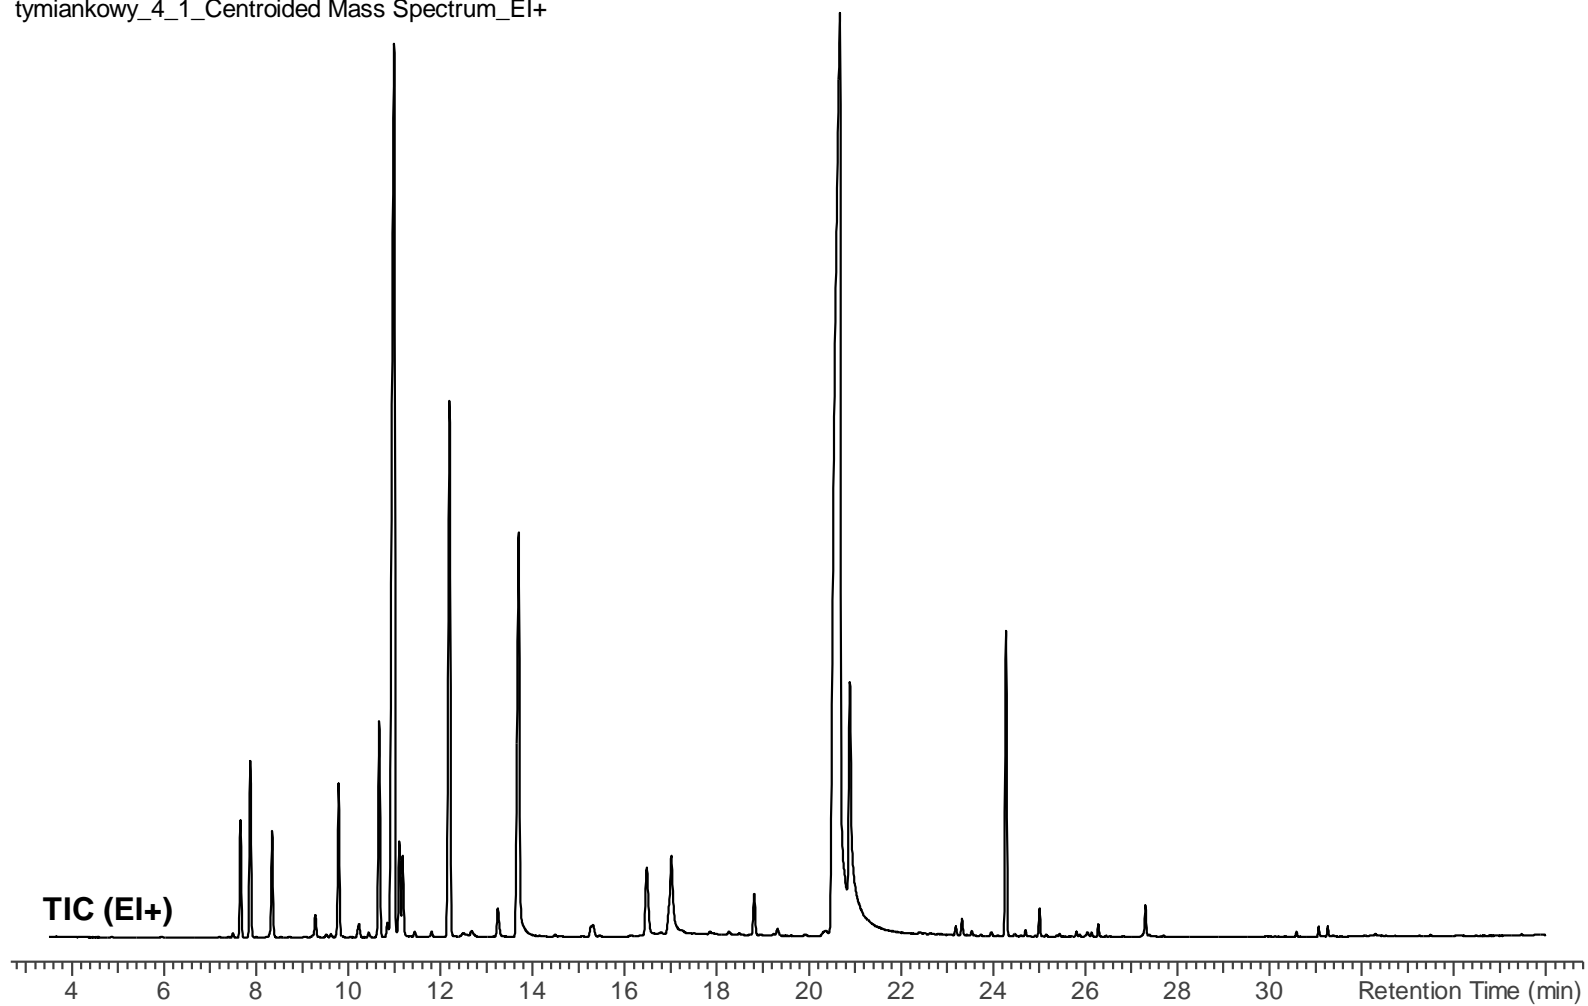

**Figure S2.** The chromatogram of thyme oil.

mieta\_8\_1\_Centroided Mass Spectrum\_EI+

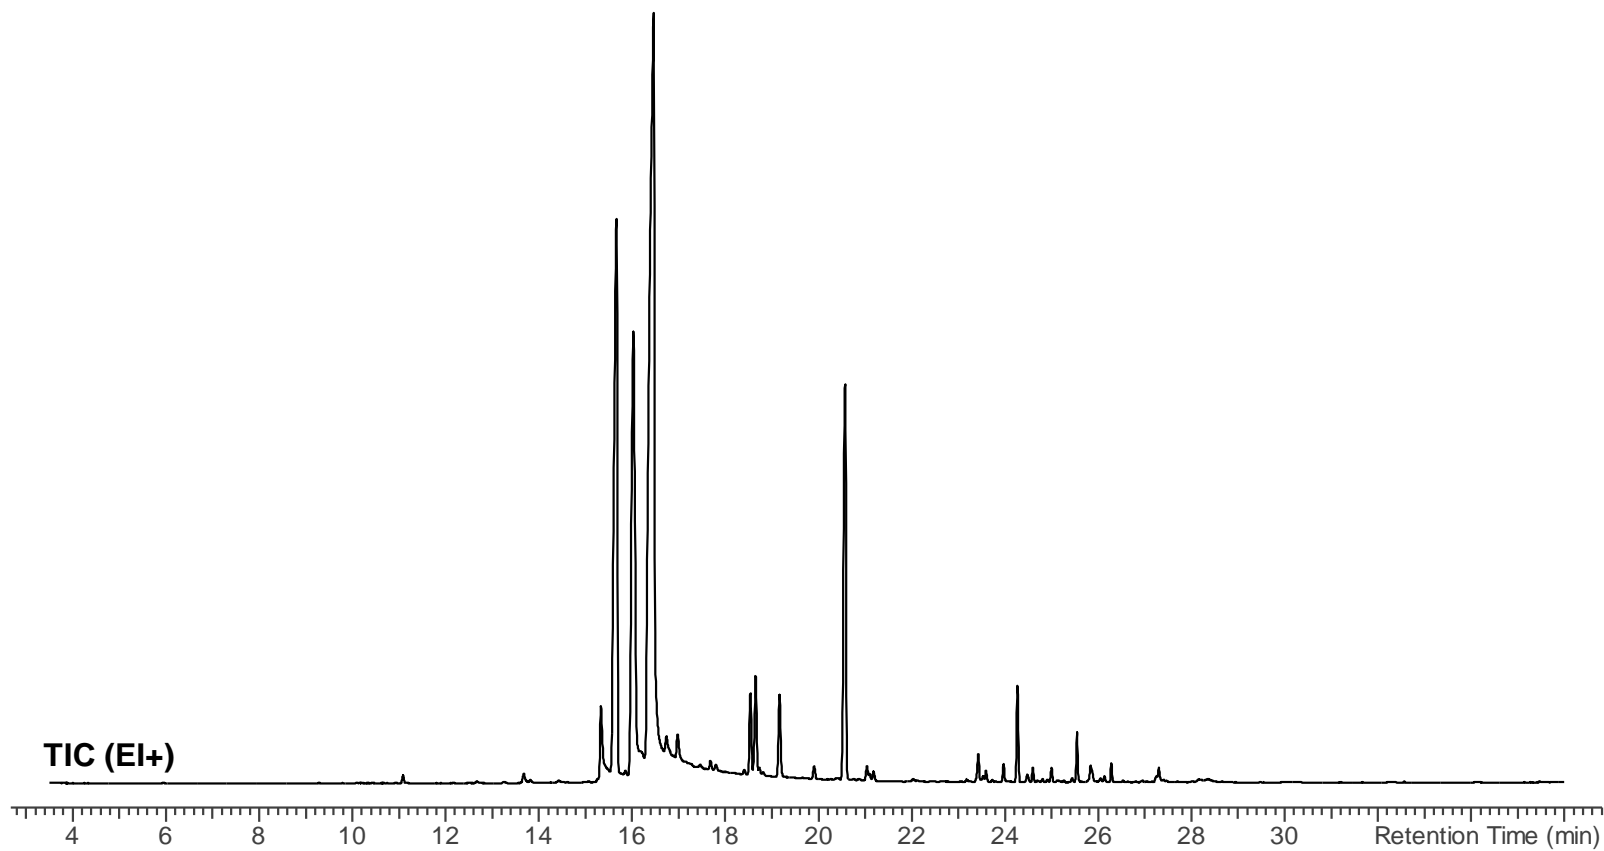

Figure S3. The chromatogram of peppermint oil.

kajeputowy\_6\_1\_Centroided Mass Spectrum\_EI+

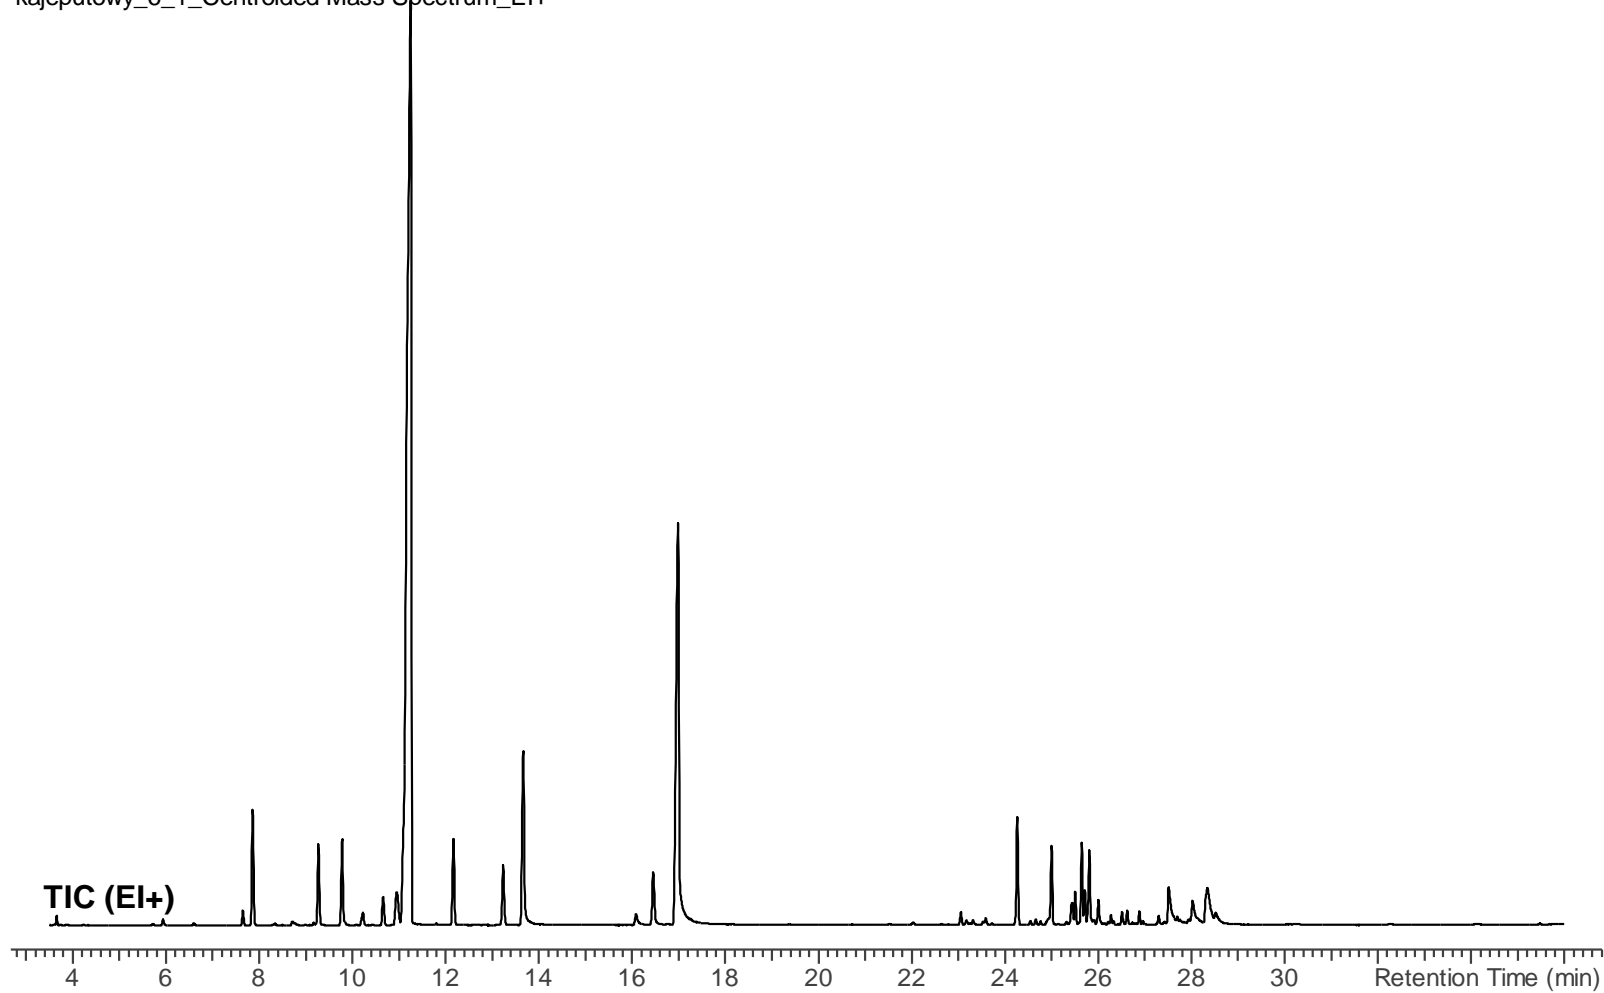

Figure S4. The chromatogram of cajeput oil.

cynamonowy\_3\_1\_Centroided Mass Spectrum\_EI+

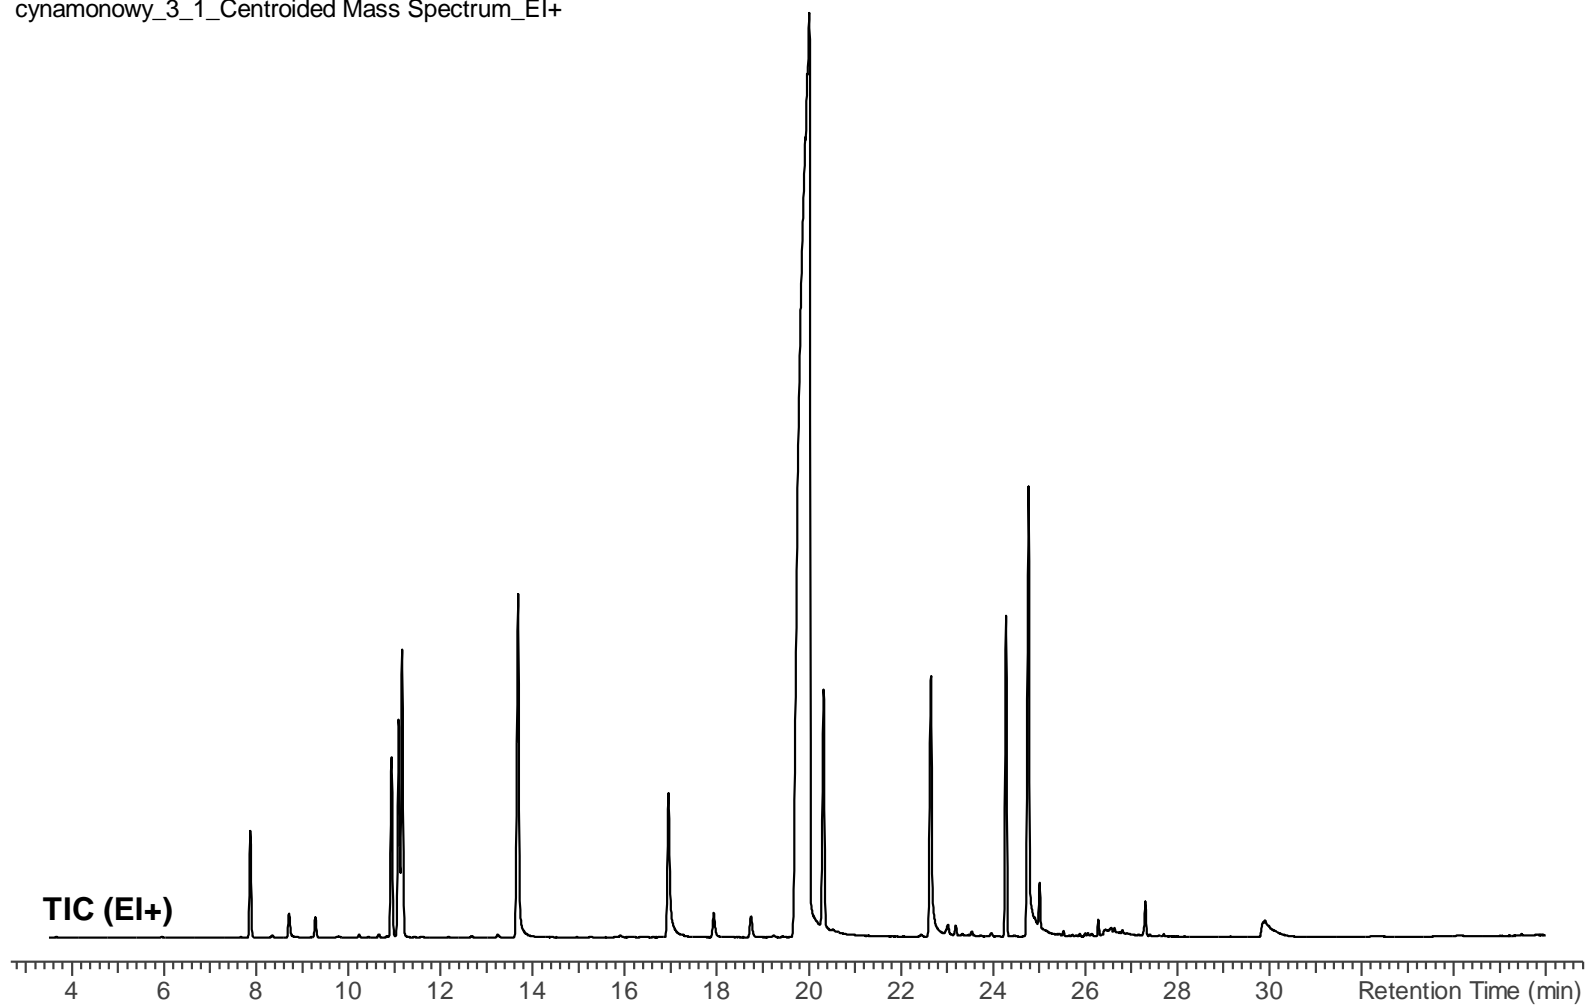

**Figure S5.** The chromatogram of cinnamon oil.

eukaliptusowy\_5\_1\_Centroided Mass Spectrum\_EI+

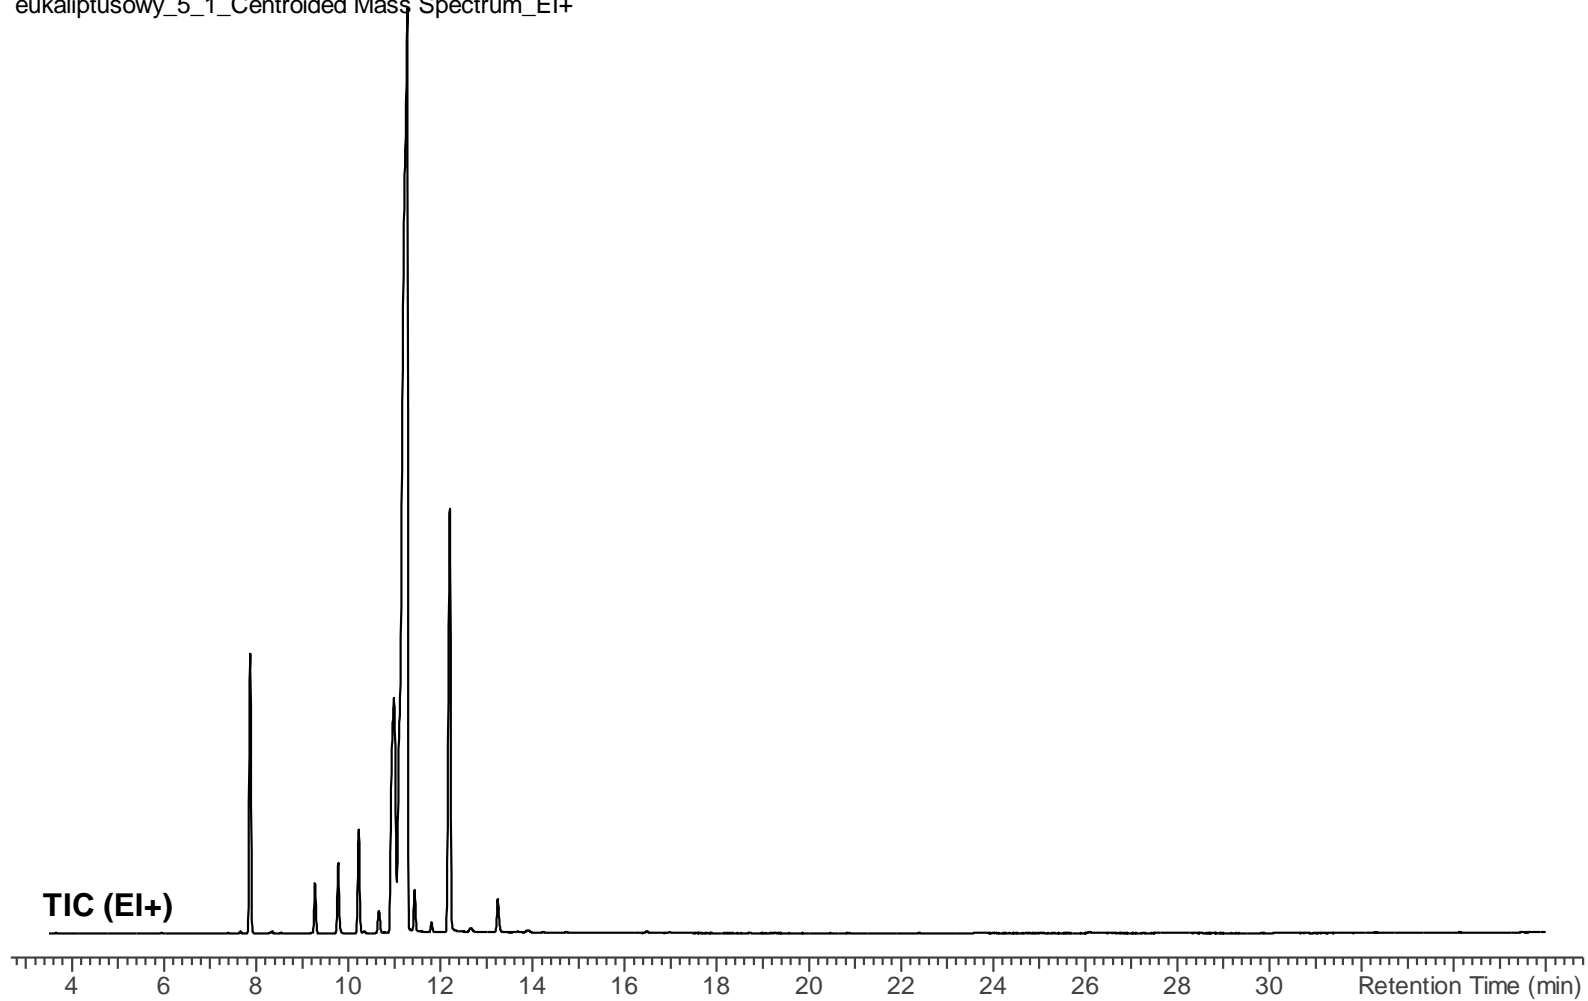

Figure S6. The chromatogram of eucalyptus oil.



gozdik\_9\_1\_Centroided Mass Spectrum\_EI+

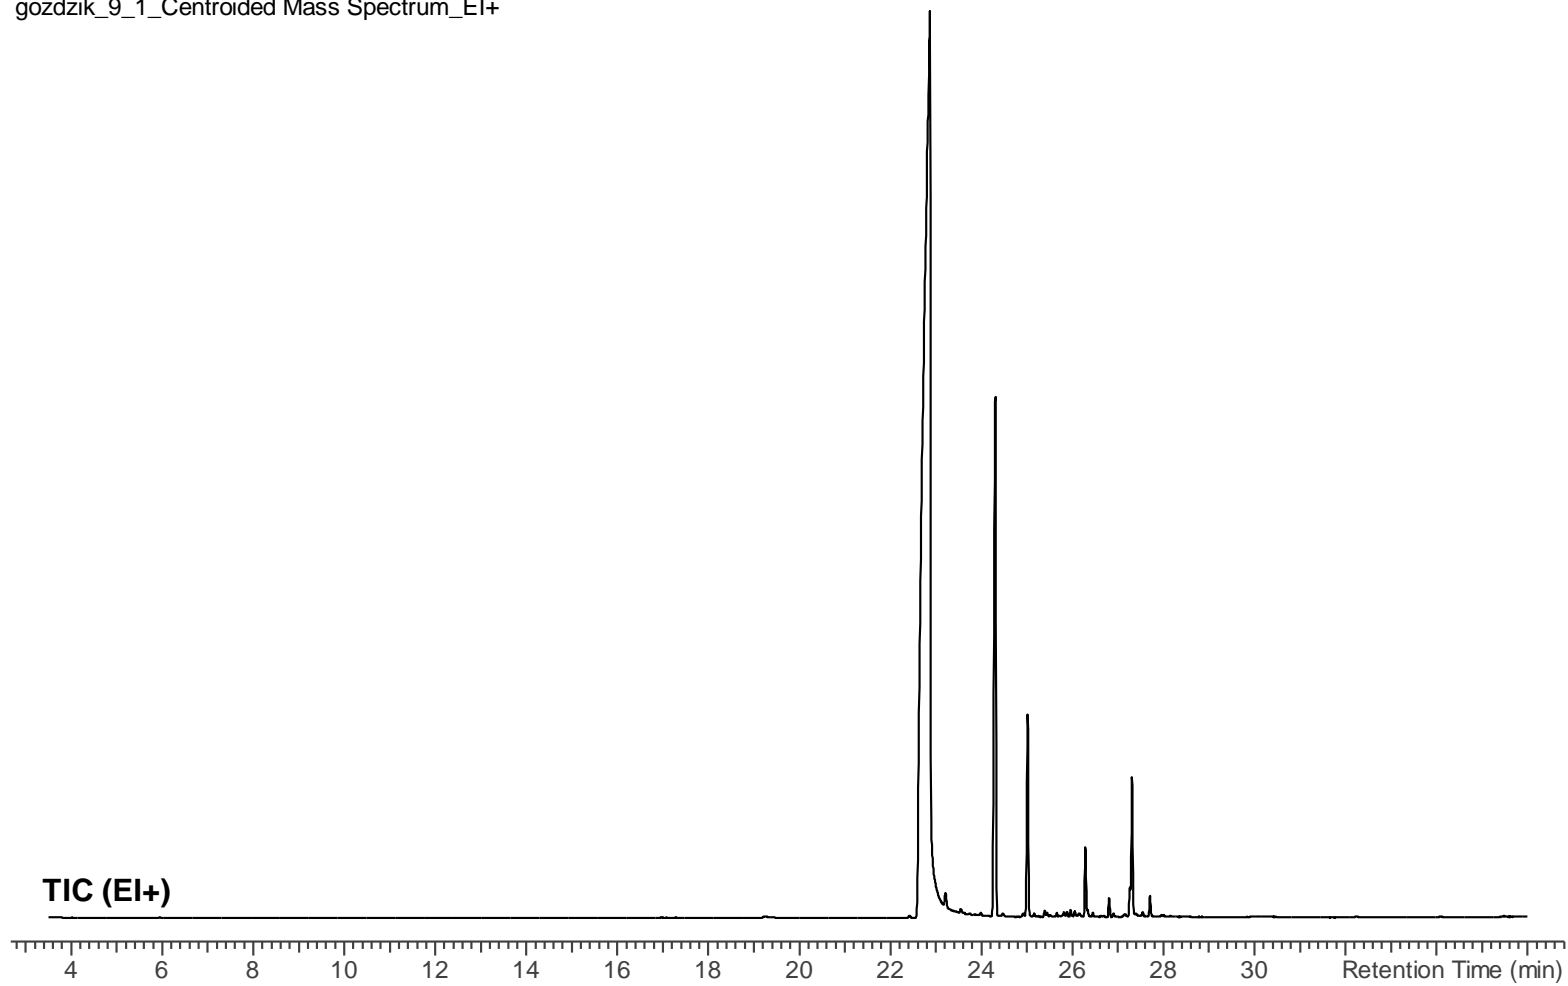

Figure S7. The chromatogram of clove oil.

Szalwia\_2\_1\_Centroided Mass Spectrum\_EI+

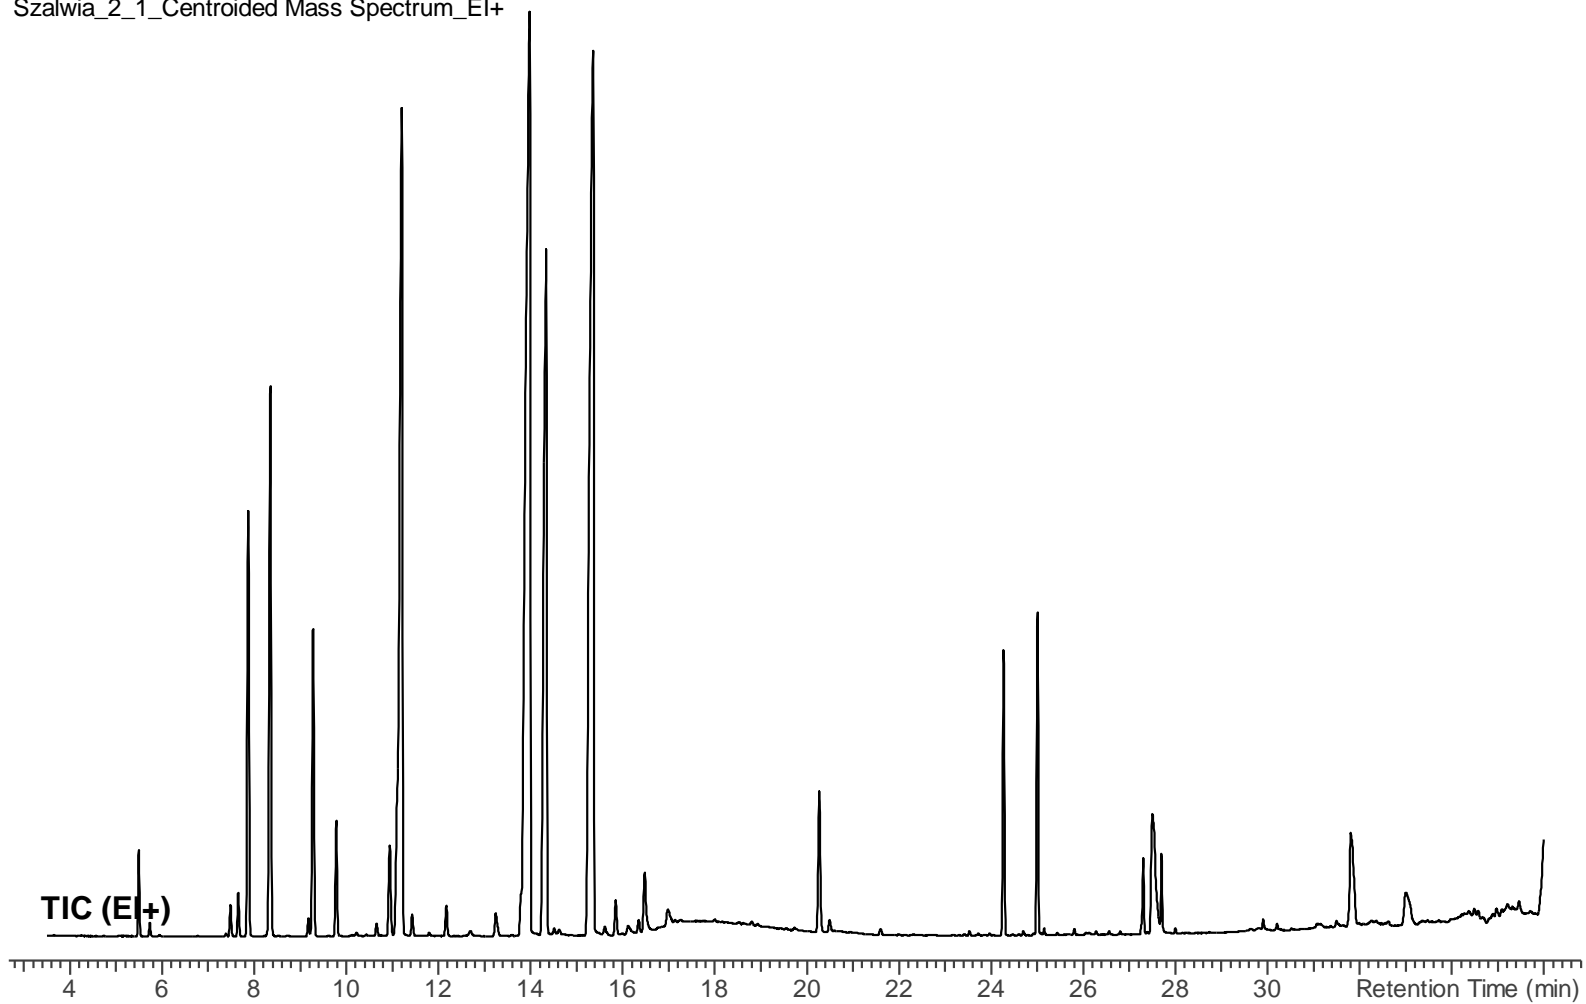

Figure S8. The chromatogram of sage oil.

dzrewo herbaciane\_10\_1\_Centroided Mass Spectrum\_EI+

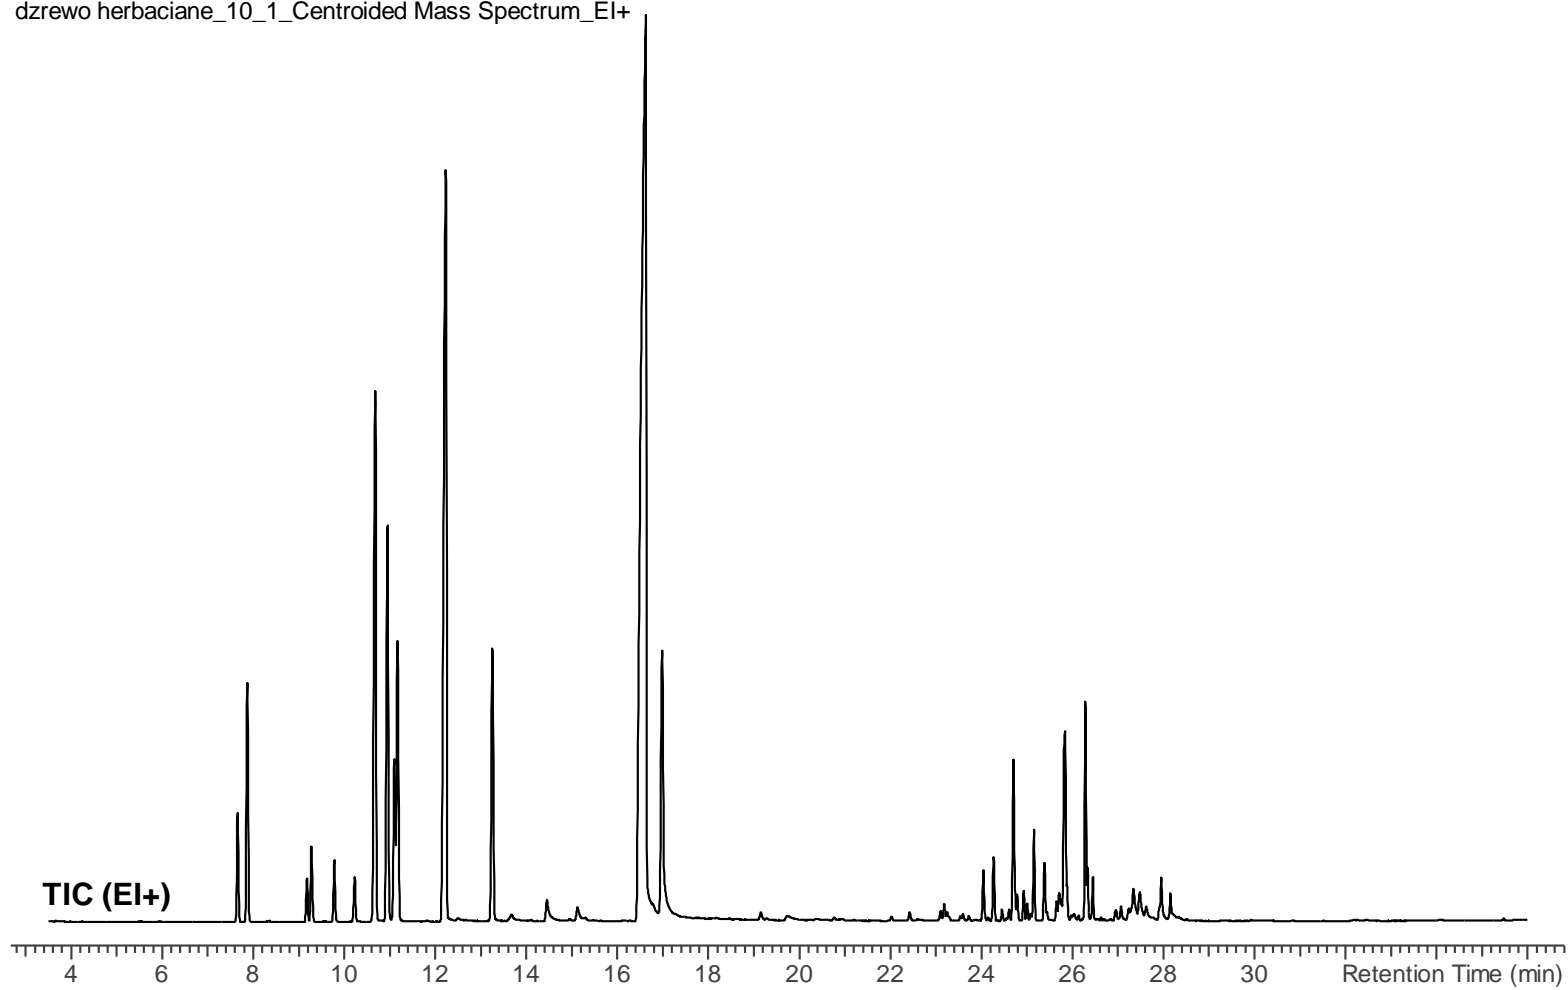

Figure S9. The chromatogram of tea tree oil.

**Table S1.** Chemical composition of EOs.

|                                 | Rt     | Lavender oil | Thyme oil | Peppermint oil | Cajeput oil | Cinnamon oil | Clove oil | Eucalyptus oil | Sage oil | Tea tree oil |
|---------------------------------|--------|--------------|-----------|----------------|-------------|--------------|-----------|----------------|----------|--------------|
| Z-Salvene                       | 5.48   |              |           |                |             |              |           |                | 0.63     |              |
| E-Salvene                       | 5.73   |              |           |                |             |              |           |                | 0.10     |              |
| $\beta$ -Picoline               | 5.937  |              |           |                | 0.13        |              |           | 0.01           |          |              |
| Tricyclene                      | 7.45   |              |           |                |             |              |           |                | 0.27     |              |
| $\alpha$ -Thujene               | 7.656  |              | 1.26      |                | 0.29        |              |           | 0.04           |          | 1.17         |
| $\alpha$ -Pinene                | 7.868  | 3.71         | 2.07      |                | 2.39        | 1.18         |           | 6.24           | 4.22     | 2.80         |
| $\alpha$ -Fenchene              | 8.285  |              | 1.17      |                |             |              |           | 0.02           | 5.85     |              |
| Camphene                        | 8.343  |              |           |                |             |              |           | 0.04           |          |              |
| (2E)-Heptenal                   | 8.343  | 1.42         |           |                |             | 0.02         |           |                |          |              |
| Thuja-2,4(10)-diene             | 8.531  |              |           |                |             |              |           | 0.01           |          |              |
| Benzaldehyde                    | 8.713  |              |           |                |             | 0.31         |           |                |          |              |
| Sabinene                        | 9.179  |              |           |                |             |              |           |                | 0.13     | 0.50         |
| $\beta$ -Pinene                 | 9.277  | 1.27         | 0.24      |                | 1.76        | 0.23         |           | 1.08           | 3.10     | 0.90         |
| Octan-3-one                     | 9.608  | 0.36         |           |                |             |              |           |                |          |              |
| Myrcene                         | 9.781  | 0.61         | 1.79      |                | 1.87        |              |           | 1.58           | 1.07     | 0.70         |
| $\alpha$ -Phellandrene          | 10.227 |              | 0.21      |                | 0.34        | 0.03         |           | 2.44           | 0.03     | 0.53         |
| Linalool oxide <dehydro-, cis-> | 10.345 |              |           |                |             |              |           | 0.05           |          |              |
| delta-3-Carene                  | 10.435 | 0.69         |           |                |             |              |           |                |          |              |
| Hexyl acetate                   | 10.552 | 0.73         |           |                |             |              |           |                |          |              |
| $\alpha$ -Terpinene             | 10.681 |              | 2.68      |                | 0.66        | 0.03         |           | 0.58           | 0.12     | 7.89         |
| para-Menth-1-ene                | 10.850 |              | 0.18      |                |             |              |           |                |          |              |
| Cymene <para->                  | 10.948 | 2.99         | 18.50     |                | 1.22        | 2.22         |           | 12.17          | 1.03     | 5.38         |

|                                            |        |       |      |       |       |      |  |       |       |       |
|--------------------------------------------|--------|-------|------|-------|-------|------|--|-------|-------|-------|
| Limonene                                   | 11.089 | 0.34  | 1.15 | 0.13  |       | 2.79 |  |       | 14.15 |       |
| Sylvestrene                                | 11.102 |       |      |       |       |      |  |       |       | 2.10  |
| Eucalyptol                                 | 11.171 | 1.66  | 0.97 |       | 50.18 | 3.48 |  | 61.29 |       | 3.65  |
| (Z)- $\beta$ -Ocimene                      | 11.440 |       |      |       |       |      |  | 0.89  | 0.20  |       |
| (E)- $\beta$ -Ocimene                      | 11.806 |       |      |       |       |      |  | 0.21  | 0.03  |       |
| $\gamma$ -Terpinene                        | 12.230 |       | 8.14 |       | 2.01  |      |  | 12.22 | 0.30  | 14.70 |
| <i>cis</i> -Linalool oxide                 | 12.670 | 1.28  |      |       |       |      |  | 0.13  | 0.06  |       |
| <i>cis</i> -Linalool oxide                 | 13.244 | 1.37  |      |       |       |      |  |       |       |       |
| <i>para</i> -Cymenene                      | 13.25  |       |      |       |       |      |  |       | 0.31  |       |
| Terpinolene                                | 13.256 |       | 0.42 |       | 1.47  |      |  | 0.84  |       | 3.76  |
| Linalool                                   | 13.673 | 28.45 | 7.14 | 0.21  | 4.61  | 5.15 |  |       | 23.30 | 0.12  |
| Solusterol                                 | 13.870 |       |      |       |       |      |  | 0.04  |       |       |
| Hex-2-enal <2-isopropyl-, 5-methyl->       | 13.916 |       |      |       |       |      |  | 0.05  |       |       |
| $\beta$ -Thujone                           | 14.3   |       |      |       |       |      |  |       | 11.63 |       |
| <i>cis</i> - <i>para</i> -Menth-2-en-1-ol  | 14.452 |       |      |       |       |      |  |       |       | 0.43  |
| $\alpha$ -Campholenal                      | 14.51  |       |      |       |       |      |  |       | 0.05  |       |
| <i>allo</i> -Ocim-(4E,6Z)-ene              | 14.728 |       |      |       |       |      |  | 0.01  |       |       |
| <i>trans</i> - <i>para</i> -Menth-2-en-1ol | 15.125 |       |      |       |       |      |  |       |       | 0.23  |
| Camphor                                    | 15.258 | 0.68  | 0.31 |       |       |      |  |       | 20.32 |       |
| Isopulegol                                 | 15.335 |       |      | 2.34  |       |      |  |       |       |       |
| Menthone                                   | 15.667 |       |      | 18.20 |       |      |  |       | 0.09  |       |
| <i>trans</i> -Pinocamphone                 | 15.857 |       |      | 0.15  |       |      |  |       | 0.36  |       |
| Menthone                                   | 16.027 |       |      | 15.69 |       |      |  |       |       |       |
| Borneol                                    | 16.071 | 0.96  |      |       |       |      |  |       |       |       |
| $\delta$ -Terpineol                        | 16.085 |       |      |       | 0.32  |      |  |       | 0.15  |       |
| <i>cis</i> -Pinocamphone                   | 16.35  |       |      |       |       |      |  |       | 0.12  |       |
| Menthol                                    | 16.461 |       |      | 40.24 |       |      |  |       |       |       |
| <i>Iso</i> Menthol                         | 16.736 |       |      | 0.42  |       |      |  |       |       |       |

|                                    |        |       |       |      |       |       |  |      |      |       |
|------------------------------------|--------|-------|-------|------|-------|-------|--|------|------|-------|
| Terpinen-4-ol                      | 16.623 | 2.42  |       |      |       | 2.58  |  | 0.05 | 0.80 | 33.94 |
| Terpineol <alpha->                 | 16.984 | 1.38  | 1.84  | 0.55 | 15.41 |       |  |      | 0.28 | 4.65  |
| <i>n</i> -Decanal                  | 17.457 |       |       | 0.07 |       |       |  |      |      |       |
| <i>n</i> -octyl acetate            | 17.680 | 0.16  |       |      |       |       |  |      |      |       |
| <i>trans</i> -Oct-2-enyl acetate   | 17.797 |       |       | 0.11 |       |       |  |      |      |       |
| ( <i>Z</i> )-Cinnamaldehyde        | 17.933 |       |       |      |       | 0.37  |  |      |      |       |
| 3-Hexenyl 2-methylbutyrate         | 18.407 |       |       | 0.08 |       |       |  |      |      |       |
| <i>cis</i> -3-hexenyl-Isovalerate  | 18.539 |       |       | 1.54 |       |       |  |      |      |       |
| Pulegone                           | 18.652 |       |       | 2.08 |       |       |  |      |      |       |
| hexyl-, 3-methyl butanoate<br>< -> | 18.735 | 0.21  |       | 0.13 |       |       |  |      |      |       |
| <i>o</i> -Anisaldehyde             | 18.742 |       |       |      |       | 0.35  |  |      |      |       |
| Carvacryl methyl ether             | 18.812 |       | 0.56  |      |       |       |  |      |      |       |
| Carvone                            | 18.820 |       |       | 0.06 |       |       |  |      |      |       |
| Carvotanacetone                    | 19.163 |       |       | 1.69 |       |       |  |      |      |       |
| <i>cis</i> -Piperitone oxide <     | 19.140 | 0.22  |       |      |       |       |  |      |      |       |
| Dec-(4 <i>Z</i> )-en-1-ol          | 19.153 |       |       |      |       |       |  |      |      | 0.11  |
| Neobergamate                       | 19.336 | 2.19  | 0.07  |      |       |       |  |      |      |       |
| Neomenthyl acetate                 | 19.906 |       |       | 0.24 |       |       |  |      |      |       |
| ( <i>E</i> )-Cinnamaldehyde        | 20.007 |       |       |      |       | 61.48 |  |      |      |       |
| isobornyl acetate                  | 20.26  |       |       |      |       |       |  |      | 1.60 |       |
| ( <i>E</i> )-Anethole              | 20.319 |       |       |      |       | 3.48  |  |      |      |       |
| Lavandulyl acetate                 | 20.433 | 31.09 |       |      |       |       |  |      |      |       |
| Bornyl acetate                     | 20.49  |       |       |      |       |       |  |      | 0.13 |       |
| Menthyl acetate                    | 20.568 |       |       | 9.39 |       |       |  |      |      |       |
| Thymol                             | 20.674 |       | 39.14 |      |       |       |  |      |      |       |
| Carvacrol                          | 20.890 |       | 6.03  |      |       |       |  |      |      |       |
| Isomenthyl acetate                 | 21.038 |       |       | 0.29 |       |       |  |      |      |       |
| Nonyl acetate                      | 21.100 |       |       | 0.12 |       |       |  |      |      |       |

|                                                              |        |      |      |      |      |      |       |  |      |      |
|--------------------------------------------------------------|--------|------|------|------|------|------|-------|--|------|------|
| cis- $\alpha$ Terpinyl acetate                               | 21.124 | 0.18 |      |      |      |      |       |  |      |      |
| iso-Verbanol acetate                                         | 21.181 |      |      | 0.18 |      |      |       |  |      |      |
| Myrtenyl acetate                                             | 21.59  |      |      |      |      |      |       |  | 0.06 |      |
| n-hexyl-Tiglate                                              | 21.758 | 0.19 |      |      |      |      |       |  |      |      |
| Citronellyl acetate                                          | 22.087 | 0.64 |      |      |      |      |       |  |      |      |
| $\alpha$ -Cubebene                                           | 22.424 |      |      |      |      |      |       |  |      | 0.11 |
| neoiso-Dihydro carveol acetate                               | 22.438 | 1.03 |      |      |      |      |       |  |      |      |
| Carbonic acid <4-cycloocten-1-yl-, methyl-> ester            | 22.529 | 0.84 |      |      |      |      |       |  |      |      |
| Linalool isobutanoate                                        | 22.815 | 4.27 |      |      |      |      |       |  |      |      |
| Eugenol                                                      | 22.649 |      |      |      |      | 4.08 | 78.84 |  |      |      |
| Propan-2-one <methoxy-3-phenyl->                             | 23.019 |      |      |      |      | 0.15 |       |  |      |      |
| Longicyclene                                                 | 23.055 |      |      |      | 0.10 |      |       |  |      |      |
| Isoledene                                                    | 23.105 |      |      |      |      |      |       |  |      | 0.12 |
| $\alpha$ -Copaene                                            | 23.185 | 0.23 |      |      | 0.27 | 0.12 | 0.25  |  |      | 0.20 |
| 2-epi-a- Funebrene                                           | 23.189 |      | 0.10 |      |      |      |       |  |      |      |
| $\beta$ -Patchoulene                                         | 23.248 |      |      |      |      |      |       |  |      | 0.13 |
| trans-Geranyl acetate                                        | 23.320 | 0.81 |      |      | 0.12 |      |       |  |      |      |
| But-(2E)-en-1-one <1-(2,4,4-trimethyl-, 2-cyclohexen-1-yl)-> | 23.325 |      | 0.20 |      |      |      |       |  |      |      |
| $\beta$ Cubebene                                             | 23.538 | 0.18 |      |      |      |      |       |  |      |      |
| Tetradec-1-ene                                               | 23.548 |      |      |      |      | 0.04 | 0.06  |  |      |      |
| $\beta$ -Elemene                                             | 23.596 |      |      | 0.52 | 0.13 |      |       |  |      | 0.08 |
| Longifolene                                                  | 23.957 |      |      |      |      | 0.05 |       |  |      |      |
| Decyl acetate                                                | 23.969 |      |      | 0.27 |      |      |       |  |      |      |
| $\alpha$ -Gurjunene                                          | 24.042 |      |      |      |      |      |       |  |      | 0.59 |
| (E)- $\beta$ -Caryophyllene                                  | 24.268 | 1.18 | 3.57 | 1.55 | 2.22 | 3.61 | 11.93 |  | 2.48 | 0.71 |

|                                                                 |        |      |      |      |      |      |      |  |      |      |
|-----------------------------------------------------------------|--------|------|------|------|------|------|------|--|------|------|
| $\beta$ -Copaene                                                | 24.479 |      |      | 0.15 |      |      |      |  |      |      |
| $\gamma$ -Maaliene                                              | 24.452 |      |      |      |      |      |      |  |      | 0.12 |
| $\alpha$ -Guaiene                                               | 24.545 |      |      |      | 0.07 |      |      |  |      |      |
| <i>n</i> -octyl-Isovalerate                                     | 24.598 |      |      | 0.20 |      |      |      |  |      |      |
| Maaliene <alpha->                                               | 24.609 |      |      |      |      |      |      |  |      | 0.12 |
| Himachalene <alpha->                                            | 24.703 |      | 0.07 |      |      |      |      |  | 0.04 | 1.99 |
| ( <i>E</i> )-Cinnamyl acetate                                   | 24.770 |      |      |      |      | 6.73 |      |  |      |      |
| Selina-5,11-diene                                               | 24.786 |      |      |      |      |      |      |  |      | 0.26 |
| <i>trans</i> -Muuroala-3,5-diene                                | 24.929 |      |      |      |      |      |      |  |      | 0.30 |
| <i>trans</i> -Prenyl limonene                                   | 24.999 |      | 0.29 |      | 1.74 |      |      |  |      |      |
| $\alpha$ -Humulene                                              | 25.003 | 0.39 |      | 0.22 |      | 0.58 | 3.62 |  | 2.78 | 0.17 |
| 9-epi-( <i>E</i> )-Caryophyllene                                | 25.154 |      |      |      |      |      | 0.06 |  |      | 0.95 |
| <i>trans</i> -Dodec-2-en-1-ol                                   | 25.165 | 0.17 |      |      |      |      |      |  |      |      |
| Cadina-1(6),4-diene                                             | 25.385 |      |      |      |      |      | 0.10 |  |      | 0.62 |
| $\gamma$ -Muurolene                                             | 25.440 |      |      | 0.05 |      |      |      |  |      | 0.07 |
| $\gamma$ -Gurjunene                                             | 25.440 |      |      |      | 0.64 |      |      |  |      |      |
| Germacrene D                                                    | 25.450 |      |      | 0.71 |      |      | 0.06 |  |      |      |
| $\alpha$ -Amorphene                                             | 25.507 |      |      |      | 0.59 |      |      |  |      |      |
| $\alpha$ -Curcumene                                             | 25.526 |      |      |      |      | 0.04 |      |  |      |      |
| $\beta$ -Selinene                                               | 25.650 |      |      |      | 1.58 |      |      |  |      | 0.19 |
| $\delta$ -Selinene                                              | 25.710 |      |      |      | 0.60 |      |      |  |      | 0.38 |
| $\gamma$ -Amorphene                                             | 25.755 |      |      |      |      |      |      |  |      | 0.18 |
| $\alpha$ -Selinene                                              | 25.814 |      |      |      | 1.62 |      | 0.06 |  |      |      |
| 1-Methyl-3-(4-methylpent-3-enyl)cyclohex-3-ene-1-carboxaldehyde | 25.815 | 0.78 |      |      |      |      |      |  |      |      |
| Bicyclogermacrene                                               | 25.836 |      |      | 0.37 |      |      |      |  |      | 3.33 |
| $\alpha$ -Muurolene                                             | 25.883 |      |      |      |      |      | 0.06 |  |      |      |
| $\beta$ -Dihydroagarofuran                                      | 25.910 |      |      |      | 0.09 |      |      |  |      |      |



|                                     |        |      |      |      |      |      |      |  |      |      |
|-------------------------------------|--------|------|------|------|------|------|------|--|------|------|
| ( <i>E,E</i> )- $\alpha$ -Farnesene | 25.960 |      |      |      |      |      | 0.10 |  |      |      |
| Lavandulyl <2-methyl-> butyrate     | 25.979 | 0.60 |      |      |      |      |      |  |      |      |
| $\beta$ -Bisabolene                 | 25.995 |      |      |      |      | 0.02 |      |  |      |      |
| $\delta$ -Amorphene                 | 26.005 |      |      |      | 0.52 |      |      |  |      |      |
| $\delta$ -Cadinene                  | 26.135 |      |      | 0.08 |      |      |      |  |      |      |
| $\alpha$ -Bulnesene                 | 26.035 |      |      |      |      |      |      |  |      | 0.12 |
| $\gamma$ -Cadinene                  | 26.137 | 0.28 |      |      |      |      |      |  |      |      |
| Z-nerolidol                         | 26.286 |      | 0.11 | 0.25 | 0.17 | 0.15 | 1.20 |  |      | 2.12 |
| $\gamma$ -Cuprenene                 | 26.334 |      |      |      |      |      |      |  |      | 0.44 |
| Cadina-1,4-diene <trans->           | 26.448 |      |      |      |      |      | 0.06 |  |      | 0.41 |
| Selina-4(15),7(11)-diene            | 26.510 |      |      |      | 0.26 |      |      |  |      |      |
| Selina-3,7(11)-diene                | 26.622 |      |      |      | 0.23 |      |      |  |      |      |
| $\alpha$ -Calacorene                | 26.631 |      |      |      |      | 0.03 |      |  |      |      |
| <i>epi</i> -Longipinanol <          | 26.808 | 0.30 |      |      |      | 0.03 | 0.30 |  |      |      |
| Longipinanol                        | 26.883 |      |      |      | 0.21 |      |      |  |      |      |
| Guaiol                              | 26.954 |      |      |      |      |      |      |  |      | 0.16 |
| Ledol                               | 27.068 |      |      |      |      |      |      |  |      | 0.18 |
| Fokienol                            | 27.236 |      |      | 0.11 |      |      |      |  |      | 0.15 |
| Caryophyllene oxide                 | 27.311 | 3.50 |      | 0.22 | 0.16 | 0.37 | 2.69 |  | 0.63 |      |
| Viridiflorol                        | 27.339 |      | 0.31 |      |      |      |      |  | 2.62 | 0.67 |
| Guaiol                              | 27.480 |      |      |      |      |      |      |  |      | 0.52 |
| Cubenol <1,10-di- <i>epi</i> ->     | 27.512 |      |      |      |      | 1.37 |      |  |      |      |
| Eremoligenol                        | 27.623 |      |      |      |      |      |      |  |      | 0.21 |
| allo-Aromandendrene epoxide         | 27.7   |      |      |      |      |      |      |  | 0.48 |      |
| Bulnesol                            | 27.951 |      |      |      |      |      |      |  |      | 0.62 |
| Patchoulyl acetate                  | 28.027 |      |      |      | 0.62 |      |      |  |      |      |
| Caryophyllene acetate               | 28.154 |      |      |      |      |      |      |  |      | 0.22 |
| Guaiac acetate                      | 28.341 |      |      |      | 2.00 |      |      |  |      |      |

|                          |        |  |      |  |      |      |  |  |      |  |
|--------------------------|--------|--|------|--|------|------|--|--|------|--|
| Guaiac acetate           | 28.520 |  |      |  | 0.41 |      |  |  |      |  |
| $\beta$ -Bisabolenol     | 29.904 |  |      |  |      | 0.30 |  |  |      |  |
| Manool                   | 30.0   |  |      |  |      |      |  |  | 0.08 |  |
| (5Z,9E)-Farnesyl acetone | 31.067 |  | 0.09 |  |      |      |  |  |      |  |

**Table S2.** The antimicrobiological activity of EOs.

| Essential oil                                | Main constituents                         | Microorganism                            | Reference |      |
|----------------------------------------------|-------------------------------------------|------------------------------------------|-----------|------|
| <i>Lavandula angustifolia</i> Mill.          | linalyl acetate<br>linalool               | <i>Herpes simplex</i>                    | [15]      |      |
|                                              |                                           | <i>Staphylococcus aureus</i> (MRSA)      | [17]      |      |
|                                              |                                           | <i>S. aureus</i> ATCC 25923              | [13]      |      |
|                                              |                                           | <i>S. aureus</i> MRSA / ORSA             |           |      |
|                                              |                                           | <i>Escherichia coli</i> [enro (-)]       |           |      |
|                                              |                                           | <i>Pseudomonas aeruginosa</i>            |           |      |
|                                              |                                           | <i>Salmonella typhimurium</i> ATCC 14028 |           |      |
|                                              |                                           | <i>Candida albicans</i> ATCC 10231       | [18]      |      |
|                                              |                                           | <i>Enterococcus</i> sp. (VRE)            |           |      |
|                                              |                                           | <i>Shigella flexneri</i>                 |           | [20] |
|                                              |                                           | <i>Haemophilus influenzae</i>            |           | [23] |
|                                              |                                           | <i>Aureobasidium pullulans</i>           |           | [25] |
|                                              |                                           | <i>Penicillium citrinum</i>              |           |      |
|                                              |                                           | <i>Penicillium simplicissimum</i>        |           |      |
|                                              |                                           | <i>Botrytis cinerea</i>                  |           | [26] |
| <i>Fusarium solani</i> var. <i>coeruleum</i> | [27]                                      |                                          |           |      |
| <i>Aspergillus niger</i>                     |                                           |                                          |           |      |
| <i>Aspergillus tubingensis</i>               |                                           |                                          |           |      |
| <i>Thymus vulgaris</i> L.                    | thymol<br>p-cymene<br>$\gamma$ -terpinene | <i>Herpes simplex</i>                    | [32]      |      |
|                                              |                                           | influenza virus A1/Denver/1/57 (H1N1)    | [33]      |      |
|                                              |                                           | <i>Streptococcus mutans</i>              | [38]      |      |
|                                              |                                           | <i>Streptococcus pyogenes</i>            | [39]      |      |

|                                    |                                                                        |                                          |             |
|------------------------------------|------------------------------------------------------------------------|------------------------------------------|-------------|
|                                    |                                                                        | <i>S. aureus</i> ATCC 25923              | [28]        |
|                                    |                                                                        | <i>K. pneumoniae</i> ATCC 13882          |             |
|                                    |                                                                        | <i>Brachyspira hyodysenteriae</i>        |             |
|                                    |                                                                        | <i>Malassezia furfur</i> (drożdże)       | [40]        |
|                                    |                                                                        | <i>Fusarium graminearum</i> Fg 06-17     | [41]        |
|                                    |                                                                        | <i>Aspergillus flavus</i>                | [43]        |
|                                    |                                                                        | <i>Aspergillus niger</i>                 |             |
|                                    |                                                                        | <i>Botrytis cinerea</i> ATCC12481        | [44]        |
|                                    |                                                                        | <i>Penicillium expansum</i>              |             |
|                                    |                                                                        | <i>Herpes simplex</i>                    | [47]        |
|                                    |                                                                        | <i>Escherichia coli</i> WDCM 00013       | [49]        |
|                                    |                                                                        | <i>Listeria monocytogenes</i> WDCM 00020 |             |
|                                    |                                                                        | <i>Pseudomonas aeruginosa</i> WDCM 00024 |             |
|                                    |                                                                        | <i>Salmonella enterica</i> WDCM 00030    |             |
|                                    |                                                                        | <i>Staphylococcus aureus</i> WDCM 00032  |             |
|                                    |                                                                        | <i>Candida albicans</i>                  | [7, 50, 52] |
|                                    |                                                                        | <i>Candida tropicalis</i>                | [50]        |
|                                    |                                                                        | <i>Pichia anomala</i>                    |             |
|                                    |                                                                        | <i>Saccharomyces cerevisiae</i>          |             |
|                                    |                                                                        | <i>Streptococcus mutans</i>              | [56]        |
|                                    |                                                                        | <i>Alternaria alternata</i>              | [57]        |
|                                    |                                                                        | <i>Aspergillus flavus</i>                |             |
|                                    |                                                                        | <i>Aspergillus niger</i>                 |             |
|                                    |                                                                        | <i>Colletotrichum gloeosporioides</i>    |             |
|                                    |                                                                        | <i>Fusarium solani</i>                   |             |
|                                    |                                                                        | <i>Macrophomina phaseol</i>              |             |
|                                    |                                                                        | <i>Bacillus cereus</i>                   | [63]        |
|                                    |                                                                        | <i>Bacillus subtilis</i>                 |             |
|                                    |                                                                        | <i>Corynebacterium diphtheriae</i>       |             |
|                                    |                                                                        | <i>Corynebacterium minutissimus</i>      |             |
|                                    |                                                                        | <i>Enterococcus faecium</i>              |             |
|                                    |                                                                        | <i>Listeria monocytogenes</i>            |             |
| <i>Mentha piperita</i> (L.) Hudson | menthol<br>menthone<br>cineol<br>menthyl acetate<br>isomenthone        |                                          |             |
| <i>Melaleuca leucadendron</i> L.   | 1,8-cyneole<br>$\gamma$ -terpinene<br>$\alpha$ -pinene<br>viridiflorol |                                          |             |

|                              |                                                                                                          |                                          |              |
|------------------------------|----------------------------------------------------------------------------------------------------------|------------------------------------------|--------------|
|                              |                                                                                                          | <i>Staphylococcus epidermidis</i>        |              |
|                              |                                                                                                          | <i>Alcaligenes faecalis</i> ATCC 356551  | [65]         |
|                              |                                                                                                          | <i>Bacillus cereus</i> ATCC 14579        |              |
|                              |                                                                                                          | <i>Enterobacter cloacae</i> ATCC 23355   |              |
|                              |                                                                                                          | <i>Escherichia coli</i> ATCC 25922       |              |
|                              |                                                                                                          | <i>Streptococcus faecalis</i> ATCC 19433 |              |
|                              |                                                                                                          | <i>Staphylococcus aureus</i> ATCC 259231 |              |
|                              |                                                                                                          | <i>Micrococcus luteus</i> ATCC 4698      |              |
|                              |                                                                                                          | <i>Candida albicans</i> ATCC 14053       |              |
|                              |                                                                                                          | <i>Acinetobacter</i> spp.                | [59]         |
|                              |                                                                                                          | <i>Klebsiella</i> spp.                   |              |
|                              |                                                                                                          | <i>Pseudomonas aeruginosa</i>            |              |
|                              |                                                                                                          | <i>Aspergillus niger</i>                 |              |
| <i>Cinnamomum zeylanicum</i> |                                                                                                          | HSV1                                     | [72]         |
|                              |                                                                                                          | H1N1                                     | [33, 72]     |
|                              |                                                                                                          | <i>Acinobacter baumannii</i>             | [73]         |
|                              |                                                                                                          | <i>Staphylococcus aureus</i>             | [73, 77]     |
|                              |                                                                                                          | <i>Escherichia coli</i>                  | [73, 77, 81] |
|                              |                                                                                                          | <i>Pseudomonas aeruginosa</i>            | [73,77]      |
|                              |                                                                                                          | <i>Borrelia burgdorferi</i>              | [74]         |
|                              |                                                                                                          | <i>Enterococcus faecalis</i>             | [77]         |
|                              |                                                                                                          | <i>Salmonella typhimurium</i>            | [6]          |
|                              |                                                                                                          | <i>Listeria monocytogenes</i>            |              |
|                              |                                                                                                          | <i>Escherichia coli</i>                  | [81]         |
|                              |                                                                                                          | <i>Candida albicans</i>                  |              |
|                              |                                                                                                          | <i>Escherichia coli</i> PTCC 1163        | [79]         |
|                              |                                                                                                          | <i>Staphylococcus aureus</i> PTTC 25923  |              |
|                              |                                                                                                          | <i>Aspergillus niger</i>                 |              |
|                              |                                                                                                          | <i>Cladosporium herbarum</i>             | [83]         |
|                              |                                                                                                          | <i>Fusarium culmorum</i>                 |              |
|                              |                                                                                                          | <i>Fusarium oxysporum</i>                |              |
|                              |                                                                                                          | <i>Fusarium solani</i>                   |              |
|                              | <i>trans</i> -cinnamaldehyde<br>cinnamyl aldehyde<br>benzaldehyde<br>borneol<br>eugenol<br>cinnamic acid |                                          |              |

|                                        |                                                                               |                                              |              |
|----------------------------------------|-------------------------------------------------------------------------------|----------------------------------------------|--------------|
|                                        |                                                                               | <i>Fusarium verticillioides</i>              |              |
|                                        |                                                                               | <i>Fusarium poae</i>                         |              |
| <i>Cinnamomum cassia</i> (L.) J. Presl |                                                                               | <i>Streptococcus mutans</i> ATCC 35668       | [80]         |
| <i>Eugenia caryophyllata</i> Thunb     | eugenol<br>eugenol acetate<br>anethol<br>benzyl salicylate<br>β-caryophyllene | <i>Herpes simplex</i>                        | [32, 55, 87] |
|                                        |                                                                               | <i>Bacillus cereus</i> WU10                  | [89]         |
|                                        |                                                                               | <i>Escherichia coli</i> WU40, W1485, K12     |              |
|                                        |                                                                               | <i>Listeria innocua</i> WU 507               |              |
|                                        |                                                                               | <i>Salmonella typhimurium</i> WU73           | [90]         |
|                                        |                                                                               | <i>Aeromonas hydrophila</i> ATCC 7966        |              |
|                                        |                                                                               | <i>Candida albicans</i> ATCC 10231           |              |
|                                        |                                                                               | <i>Klebsiella pneumoniae</i> ATCC 13883      |              |
|                                        |                                                                               | <i>Proteus mirabilis</i> ATCC 10005          |              |
|                                        |                                                                               | <i>Pseudomonas aeruginosa</i> ATCC 27853     |              |
|                                        |                                                                               | <i>Staphylococcus aureus</i> ATCC 6538,      | [10]         |
|                                        |                                                                               | <i>Staphylococcus epidermidis</i> ATCC 14990 |              |
|                                        |                                                                               | <i>Escherichia coli</i> ATCC 8739            |              |
|                                        |                                                                               | <i>Streptococcus pyogenes</i>                |              |
|                                        |                                                                               | <i>Campylobacter jejuni</i>                  |              |
|                                        |                                                                               | <i>Haemophilus influenzae</i>                |              |
|                                        |                                                                               | <i>Streptococcus agalactiae</i>              |              |
|                                        |                                                                               | <i>Staphylococcus aureus</i>                 |              |
|                                        |                                                                               | <i>Klebsiella pneumoniae</i>                 |              |
|                                        |                                                                               | <i>Salmonella enteritidis</i>                |              |
|                                        |                                                                               | <i>Bacillus subtilis</i>                     |              |
|                                        |                                                                               | <i>Morganella morganii</i>                   |              |
|                                        |                                                                               | <i>Yersinia enterocolitica</i>               | [10, 92]     |
|                                        |                                                                               | <i>Listeria monocytogenes</i>                | [91]         |
|                                        | <i>Candida albicans</i>                                                       | [86]                                         |              |
|                                        | <i>Aspergillus niger</i>                                                      |                                              |              |
|                                        | <i>Penicillium christopherum</i>                                              |                                              |              |
|                                        |                                                                               | <i>Mycobacterium phlei</i>                   |              |
| <i>Eucalyptus globulus</i> Labill      | 1,8-cineol                                                                    | <i>Herpes simplex</i>                        | [32]         |

|                                     |                                                                            |                                         |          |
|-------------------------------------|----------------------------------------------------------------------------|-----------------------------------------|----------|
|                                     | limonene<br>$\alpha$ -pinene<br>$\gamma$ -terpinene<br>$\alpha$ -terpineol | mumps virus                             | [100]    |
|                                     |                                                                            | Coxsackievirus B3 Nancy                 | [9,98]   |
|                                     |                                                                            | <i>Acinetobacter baumannii</i>          | [101]    |
|                                     |                                                                            | <i>Porphyromonas gingivalis</i>         |          |
|                                     |                                                                            | <i>Streptococcus mutans</i>             |          |
|                                     |                                                                            | <i>Edwardsiella tarda</i> FP 5060       | [102]    |
|                                     |                                                                            | <i>Lactococcus garviae</i> FP 5245      |          |
|                                     |                                                                            | <i>Photobacterium damsela</i> FP 4101   |          |
|                                     |                                                                            | <i>Streptococcus iniae</i> FP 5228      |          |
|                                     |                                                                            | <i>Streptococcus parauberis</i> FP 3287 |          |
|                                     |                                                                            | <i>Vibrio harveyi</i> FP 8370           |          |
|                                     |                                                                            | <i>Vibrio ichthyoenteri</i> FP 4004     | [103]    |
|                                     |                                                                            | <i>Staphylococcus aureus</i>            |          |
|                                     |                                                                            | <i>Escherichia coli</i>                 | [95]     |
|                                     |                                                                            | <i>Aureobasidium pullulans</i> L6F      |          |
|                                     |                                                                            | <i>Candida diversa</i> T6D              |          |
|                                     |                                                                            | <i>Hansenula polymorpha</i> CBS 4732    |          |
|                                     |                                                                            | <i>Pichia fermentans</i> T2A1           |          |
|                                     |                                                                            | <i>Pichia kluyveri</i> T1A              |          |
|                                     |                                                                            | <i>Pichia anomala</i>                   |          |
| <i>Saccharomyces cerevisiae</i> SPA |                                                                            |                                         |          |
| <i>Zygosaccharomyces bailii</i>     |                                                                            |                                         |          |
| <i>Alternaria alternata</i>         | [104]                                                                      |                                         |          |
| <i>Fusarium roseum</i>              |                                                                            |                                         |          |
| <i>Mucor hiemalis</i>               |                                                                            |                                         |          |
| <i>Penicillium glabrum</i>          |                                                                            |                                         |          |
| <i>Salvia officinalis</i> L.        | tamphor<br>$\alpha$ -thujone<br>1,8-cineol<br>$\beta$ -thujone;            | coronavirus SARS-CoV                    | [114]    |
|                                     |                                                                            | <i>Aeromonas hydrophila</i> ,           | [122]    |
|                                     |                                                                            | <i>Klebsiella oxytoca</i>               |          |
|                                     |                                                                            | <i>Aeromonas sobria</i>                 |          |
|                                     |                                                                            | <i>Bacillus megatherium</i>             | [9, 122] |
| <i>Bacillus cereus</i>              |                                                                            |                                         |          |

|                                                          |                                                             |                                            |                |
|----------------------------------------------------------|-------------------------------------------------------------|--------------------------------------------|----------------|
|                                                          |                                                             | <i>Bacillus subtilis</i>                   | [ 9, 115, 122] |
|                                                          |                                                             | <i>Escherichia coli,</i>                   | [115]          |
|                                                          |                                                             | <i>Salmonella anatum</i>                   | [120]          |
|                                                          |                                                             | <i>Salmonella typhi</i>                    | [ 9, 116]      |
|                                                          |                                                             | <i>Shigella sonei</i>                      |                |
|                                                          |                                                             | <i>Salmonella enteritidis</i>              | [116]          |
|                                                          |                                                             | <i>Staphylococcus aureus</i>               | [9, 117]       |
|                                                          |                                                             | <i>Candida albicans</i>                    |                |
|                                                          |                                                             | <i>Staphylococcus epidermidis</i>          | [118]          |
|                                                          |                                                             | <i>Streptococcus mutans</i>                | [105]          |
|                                                          |                                                             | <i>Candida glabrata</i>                    |                |
|                                                          |                                                             | <i>Candida krusei</i>                      |                |
|                                                          |                                                             | <i>Candida parapsilosis</i>                |                |
|                                                          |                                                             | <i>Aspergillus carbonarius</i>             | [123, 124]     |
|                                                          |                                                             | <i>Aspergillus niger</i>                   | [ 9, 125]      |
|                                                          |                                                             | <i>Ashbiya gossypii</i>                    | [126]          |
|                                                          |                                                             | <i>Trichoderma reesei</i>                  | [126]          |
|                                                          |                                                             | <i>Rhizopus oryzae</i>                     | [126]          |
|                                                          |                                                             | <i>Botrytis cinerea</i>                    | [127]          |
|                                                          |                                                             | <i>Alternaria solani</i>                   |                |
|                                                          |                                                             | <i>Ascochyta rabies</i>                    |                |
|                                                          |                                                             | <i>Monilia laxa</i>                        |                |
|                                                          |                                                             | <i>Penicillum italicum</i>                 |                |
|                                                          |                                                             | <i>Rhizoctonia solani</i>                  |                |
| <i>Melaluleca alternifoli</i><br>Tea tree<br>Tea tree cd | terpine-4-ol<br>teripene<br>$\alpha$ -terpinene<br>q-cymene | <i>Herpes simplex virus type 1 (HSV-1)</i> | [8, 32, 131]   |
|                                                          |                                                             | <i>Escherichia coli</i>                    | [132]          |
|                                                          |                                                             | <i>Staphylococcus aureus</i>               |                |
|                                                          |                                                             | <i>Streptococcus mutans</i>                | [129]          |
|                                                          |                                                             | <i>Porphyromonas endodontalis</i>          |                |
|                                                          |                                                             | <i>Porphyromonas gingivalis</i>            | [132, 134]     |
|                                                          |                                                             | <i>Candida albicans</i>                    |                |
|                                                          |                                                             | <i>Candida glabrata</i>                    | [8]            |

|  |  |                             |       |
|--|--|-----------------------------|-------|
|  |  | <i>Aspergillus niger</i>    | [135] |
|  |  | <i>Penicillium expansum</i> | [136] |
|  |  | <i>Botrytis cinerea</i>     | [137] |
